# Supplementary material for: Extraction of sporopollenin exine capsules from sunflower pollen grains
Source: Royal Society of Chemistry journal article supplement (doi:10.1039/c5ra27207f), 2016-01-01
Supplement: c5ra27207f1.pdf [file c5ra27207f1.pdf]

## Supporting Information

### Extraction of sporopollenin exine capsules from sunflower pollen grains

R. C. Mundargi, M. G. Potroz, J. H. Park, J. Seo, J. H. Lee, and N. -J. Cho\*

**Table S1** DIPA data of sunflower sporopollenin exine capsules <sup>a</sup>

| Sunflower pollen      | Diameter (µm ± SD) |
|-----------------------|--------------------|
| Defatted              | 37 ± 0.2           |
| Capsules <sup>b</sup> | 30 ± 0.4           |

<sup>a</sup> Dynamic imaging particle analysis performed in triplicate and reported are average with standard deviation (n= 3).

<sup>b</sup> Sporopollenin exine capsules prepared using extraction process with phosphoric acid for 10 h (2 g batch scale).

**Table S2** Sunflower sporopollenin exine capsules: CHN composition<sup>a</sup>

| Process conditions                                                                 | Carbon (%) | Hydrogen (%) | Nitrogen (%) |
|------------------------------------------------------------------------------------|------------|--------------|--------------|
| Defatted <sup>b</sup>                                                              | 48.8 ± 0.2 | 7.6 ± 0.2    | 5.2 ± 0.0    |
| HCl <sup>c</sup> acidolysis-48 h                                                   | 64.6 ± 0.5 | 7.3 ± 0.4    | 2.2 ± 0.2    |
| HCl acidolysis-10 h with extensive washing                                         | 62.0 ± 0.1 | 6.9 ± 0.5    | 2.2 ± 0.0    |
| HCl acidolysis-20 h with extensive washing                                         | 63.5 ± 0.2 | 7.3 ± 0.1    | 1.6 ± 0.0    |
| HCl acidolysis-30 h with extensive washing                                         | 64.6 ± 0.7 | 7.1 ± 0.5    | 1.6 ± 0.0    |
| H <sub>3</sub> PO <sub>4</sub> <sup>d</sup> acidolysis-10 h with extensive washing | 61.5 ± 0.3 | 7.9 ± 0.4    | 0.7 ± 0.0    |

<sup>a</sup> CHN analysis performed in triplicate and reported are average value with standard deviation. <sup>b</sup> Defatted pollen grains. <sup>c</sup> 6 M Hydrochloric acid. <sup>d</sup> 85 % (v/v) Phosphoric acid.
